# Supplementary material for: The Influence of Synthesis Conditions on the Antioxidant Activity of Selenium Nanoparticles
Source: MDPI journal article supplement (doi:10.3390/molecules27082486), 2022-04-12
Supplement: s1 [file s1]

Supplementary Material

# The Influence of Synthesis Conditions on the Antioxidant Activity of Selenium Nanoparticles

Aleksandra Sentkowska and Krystyna Pyrzyńska

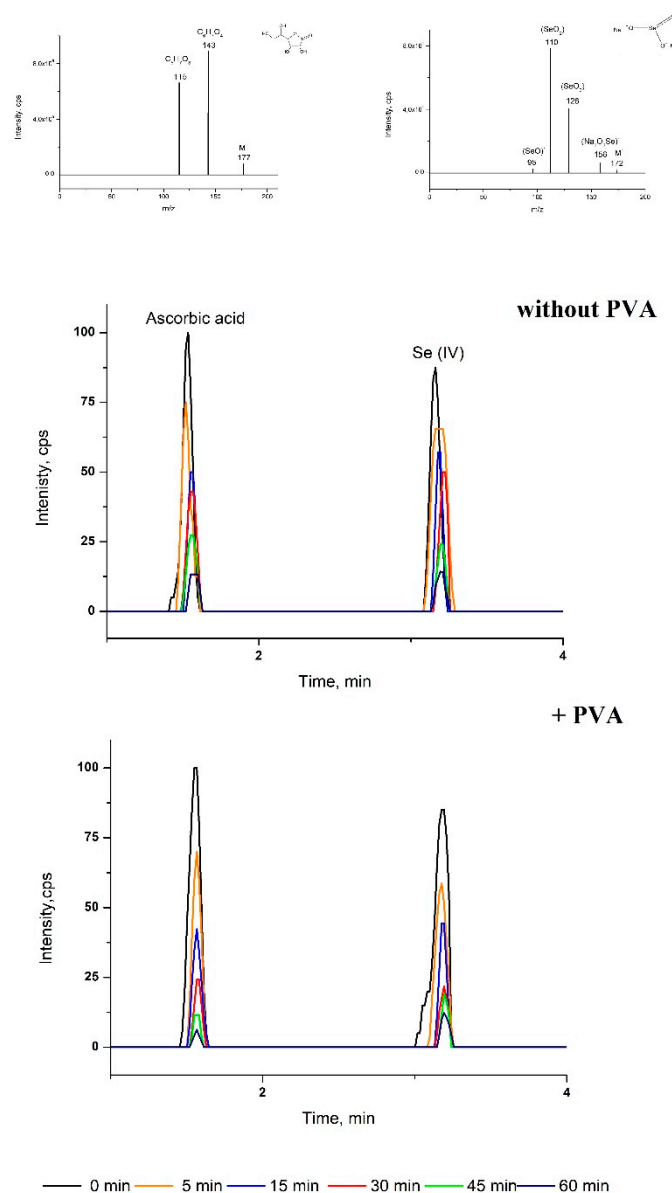

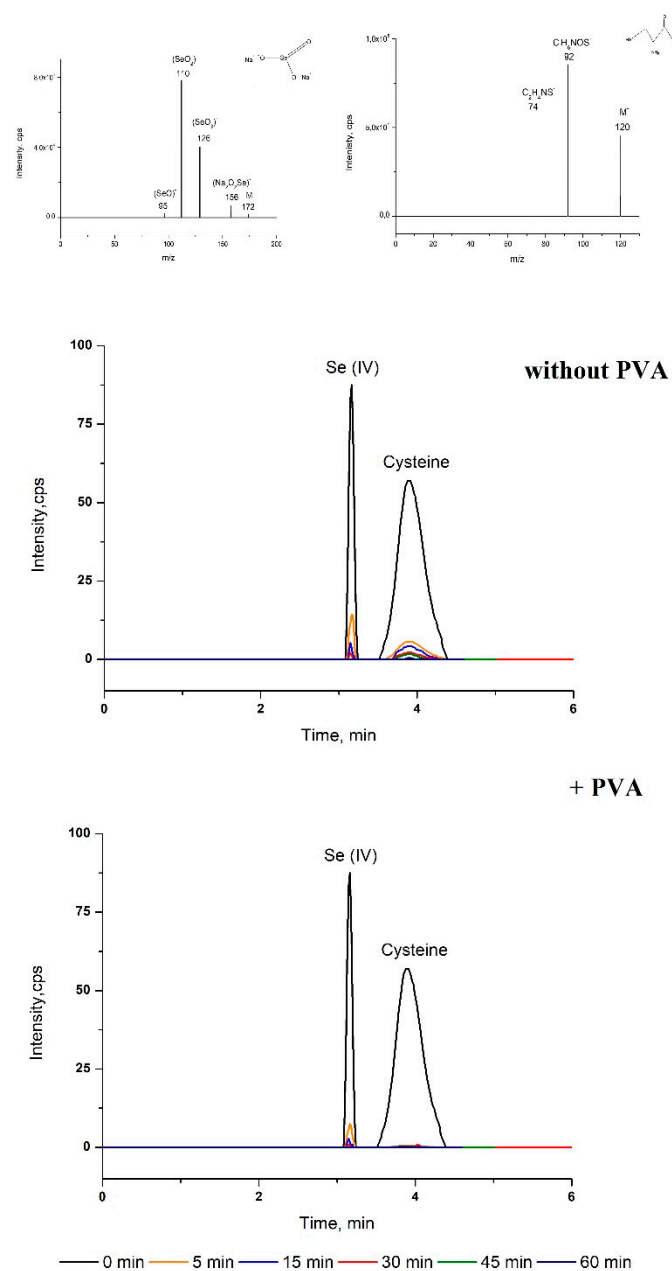

**Figure S1.** The chromatograms of Se(IV) and ascorbic acid or cysteine in the function of synthesis time.

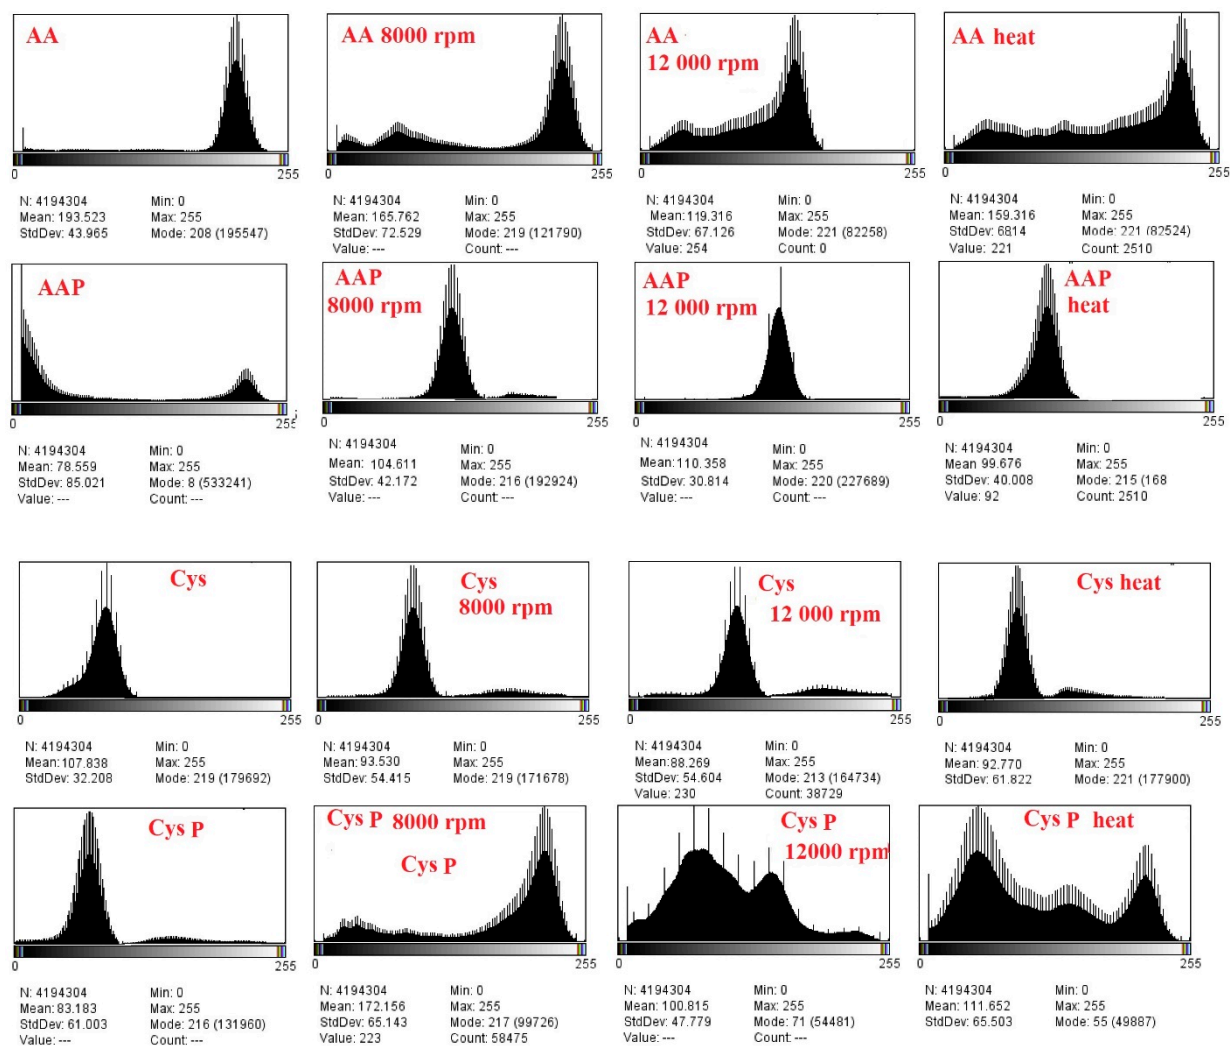

Figure S2. Particle size distribution histograms of selenium nanoparticles.
